# Supplementary material
Source: HighWire-hosted journal article supplement (https://www.jneurosci.org/content/39/37/7244)
Supplement: inline-supplementary-material-3 [file inline-supplementary-material-3.docx]

| Table 5-1 Two-way ANOVA, Tukey *post hoc* for comparison of age, sex and treatment among groups on action potential threshold and rheobase | | | | | | | | | | | |
| --- | --- | --- | --- | --- | --- | --- | --- | --- | --- | --- | --- |
|  |  |  | Threshold | | | |  | Rheobase | | | |
| Group | Tukey's multiple comparisons test |  | 95.00% CI of diff. | Significant? | Summary | Adjusted P Value |  | 95.00% CI of diff. | Significant? | Summary | Adjusted P Value |
|  |  |  |  |  |  |  |  |  |  |  |  |
| Female | Veh:Adolescent vs Veh:Adult |  | -2.722 to 1.039 | No | ns | 0.6483 |  | -32.90 to 31.85 | No | ns | >0.9999 |
|  | Veh:Adolescent vs LPS:Adolescent |  | -2.387 to 1.548 | No | ns | 0.9446 |  | -38.90 to 28.84 | No | ns | 0.9801 |
|  | Veh:Adolescent vs LPS:Adult |  | -2.530 to 1.366 | No | ns | 0.8637 |  | -32.36 to 34.70 | No | ns | 0.9997 |
|  | Veh:Adult vs LPS:Adolescent |  | -1.530 to 2.375 | No | ns | 0.9425 |  | -38.12 to 29.11 | No | ns | 0.9852 |
|  | Veh:Adult vs LPS:Adult |  | -1.673 to 2.193 | No | ns | 0.9851 |  | -31.58 to 34.97 | No | ns | 0.9992 |
|  | LPS:Adolescent vs LPS:Adult |  | -2.180 to 1.855 | No | ns | 0.9967 |  | -28.53 to 40.94 | No | ns | 0.9664 |
|  |  |  |  |  |  |  |  |  |  |  |  |
| Male | Veh:Adolescent vs Veh:Adult |  | -1.564 to 2.677 | No | ns | 0.9026 |  | -30.18 to 37.79 | No | ns | 0.9913 |
|  | Veh:Adolescent vs LPS:Adolescent |  | -1.649 to 2.592 | No | ns | 0.9379 |  | -36.11 to 31.85 | No | ns | 0.9984 |
|  | Veh:Adolescent vs LPS:Adult |  | 3.635 to 7.798 | Yes | **** | <0.0001 |  | 10.29 to 77.01 | Yes | ** | 0.0049 |
|  | Veh:Adult vs LPS:Adolescent |  | -2.261 to 2.090 | No | ns | 1.000 |  | -40.80 to 28.93 | No | ns | 0.9706 |
|  | Veh:Adult vs LPS:Adult |  | 3.022 to 7.298 | Yes | **** | <0.0001 |  | 5.587 to 74.10 | Yes | * | 0.0157 |
|  | LPS:Adolescent vs LPS:Adult |  | 3.107 to 7.383 | Yes | **** | <0.0001 |  | 11.52 to 80.04 | Yes | ** | 0.0039 |
|  |  |  |  |  |  |  |  |  |  |  |  |
| Adolescent | Veh:Female vs Veh:Male |  | -4.113 to 0.07272 | No | ns | 0.0626 |  | -50.94 to 20.58 | No | ns | 0.6857 |
|  | Veh:Female vs LPS:Female |  | -2.591 to 1.752 | No | ns | 0.9579 |  | -42.14 to 32.08 | No | ns | 0.9847 |
|  | Veh:Female vs LPS:Male |  | -3.699 to 0.6015 | No | ns | 0.2430 |  | -54.05 to 19.43 | No | ns | 0.6096 |
|  | Veh:Male vs LPS:Female |  | -0.5715 to 3.772 | No | ns | 0.2247 |  | -26.96 to 47.26 | No | ns | 0.8915 |
|  | Veh:Male vs LPS:Male |  | -1.679 to 2.622 | No | ns | 0.9402 |  | -38.87 to 34.61 | No | ns | 0.9988 |
|  | LPS:Female vs LPS:Male |  | -3.356 to 1.098 | No | ns | 0.5507 |  | -50.33 to 25.77 | No | ns | 0.8343 |
|  |  |  |  |  |  |  |  |  |  |  |  |
| Adult | Veh:Female vs Veh:Male |  | -2.522 to 1.279 | No | ns | 0.8288 |  | -41.13 to 19.43 | No | ns | 0.7864 |
|  | Veh:Female vs LPS:Female |  | -1.641 to 2.161 | No | ns | 0.9844 |  | -28.59 to 31.98 | No | ns | 0.9989 |
|  | Veh:Female vs LPS:Male |  | 2.673 to 6.404 | Yes | **** | <0.0001 |  | -0.7239 to 58.72 | No | ns | 0.0586 |
|  | Veh:Male vs LPS:Female |  | -1.084 to 2.847 | No | ns | 0.6469 |  | -18.77 to 43.85 | No | ns | 0.7233 |
|  | Veh:Male vs LPS:Male |  | 3.229 to 7.091 | Yes | **** | <0.0001 |  | 9.079 to 70.61 | Yes | ** | 0.0055 |
|  | LPS:Female vs LPS:Male |  | 2.347 to 6.209 | Yes | **** | <0.0001 |  | -3.465 to 58.07 | No | ns | 0.1009 |
|  |  |  |  |  |  |  |  |  |  |  |  |
